# Supplementary material for: Is MHC diversity a better marker for conservation than neutral genetic diversity? A case study of two contrasting dolphin populations
Source: PubMed Central journal article supplement (PMC6662329; doi:10.1002/ece3.5265), 2019-05-23
Supplement: ECE3-9-6986-s001.pdf [file ECE3-9-6986-s001.pdf]

1 **Appendix/Dryad**

2 **Is MHC diversity a better marker for conservation than neutral genetic diversity? A case**  
3 **study of two contrasting dolphin populations**

4  
5 **Authors:**

6 Oliver Manlik, Michael Krützen, Anna M. Kopps, Janet Mann, Lars Bejder, Simon J. Allen,  
7 Celine Frère, Richard C. Connor and William B. Sherwin

8

9  
10  
11  
12  
13  
14  
15  
16  
17  
18  
19  
20  
21  
22  
23  
24  
25  
26  
27  
28  
29  
30  
31  
32  
33  
34  
35  
36  
37  
38  
39  
40  
41  
42  
43  
44  
45  
46  
47  
48

|    |                 |            |     |            |     |            |     |            |     |            |     |            |     |            |     |            |     |            |     |     |     |     |     |     |     |     |     |     |
|----|-----------------|------------|-----|------------|-----|------------|-----|------------|-----|------------|-----|------------|-----|------------|-----|------------|-----|------------|-----|-----|-----|-----|-----|-----|-----|-----|-----|-----|
| 49 | <b>Variant:</b> | <b>1</b>   |     | <b>10</b>  |     | <b>20</b>  |     | <b>30</b>  |     | <b>40</b>  |     | <b>50</b>  |     | <b>60</b>  |     | <b>70</b>  |     | <b>79</b>  |     |     |     |     |     |     |     |     |     |     |
| 50 | Tu-DQB-1        | C          | ACG | GAG        | CGG | GTG        | CGG | GTC        | GTG | GAC        | AGA | TCC        | ATC | TAT        | AAC | CGG        | GAG | GAG        | TTA | GTG | CGC | TTC | GAC | AGC | GAC | GTG | GGC | GAG |
| 51 | Tu-DQB-2        | •          | ••• | •••        | ••• | •••        | ••• | •••        | ••• | •••        | ••• | •••        | ••• | •••        | ••• | •••        | ••• | •••        | ••• | ••• | ••• | ••• | ••• | ••• | ••• | ••• | ••• | ••• |
| 52 | Tu-DQB-3        | •          | ••• | •••        | ••• | •••        | ••• | •A•        | ••• | A••        | ••• | •A•        | ••• | •••        | ••• | •••        | ••• | •••        | ••• | ••• | ••• | ••• | ••• | ••• | ••• | ••• | ••• | ••• |
| 53 | Tu-DQB-4        | •          | ••• | •••        | ••• | •••        | ••• | •••        | A•• | A••        | ••• | •A•        | ••• | •••        | ••• | •••        | ••• | •••        | ••• | •A• | A•• | ••• | ••• | ••• | ••• | ••• | ••• | ••• |
| 54 | <b>Variant:</b> | <b>80</b>  |     | <b>90</b>  |     | <b>100</b> |     | <b>110</b> |     | <b>120</b> |     | <b>130</b> |     | <b>140</b> |     | <b>150</b> |     | <b>157</b> |     |     |     |     |     |     |     |     |     |     |
| 55 | Tu-DQB-1        | TTC        | CGG | GCG        | GTG | ACC        | GAG | CTG        | GGC | CGG        | CCG | GAC        | GCC | GAG        | TAC | TGG        | AAC | AGC        | CAG | AAG | GAC | ATC | CTG | GAG | CGG | AAA | CGG |     |
| 56 | Tu-DQB-2        | •••        | ••• | ••C        | ••• | •••        | ••• | •••        | ••• | •••        | TG  | AT         | ••• | •••        | ••• | •••        | ••• | •••        | ••• | ••• | ••• | T   | ••• | ••• | ••• | ••• | ••• |     |
| 57 | Tu-DQB-3        | •••        | ••• | •••        | ••• | •••        | ••• | •••        | ••• | •••        | ••• | •••        | ••• | •••        | ••• | •••        | ••• | •••        | ••• | ••• | ••• | ••• | ••• | ••• | ••• | GA  | G   | ••• |
| 58 | Tu-DQB-4        | •••        | ••• | •••        | ••• | •••        | ••• | •••        | ••• | •••        | ••• | •••        | ••• | •••        | ••• | •••        | ••• | •••        | ••• | ••• | ••• | ••• | ••• | ••• | ••• | •A  | G   | ••• |
| 59 | <b>Variant:</b> | <b>160</b> |     | <b>172</b> |     |            |     |            |     |            |     |            |     |            |     |            |     |            |     |     |     |     |     |     |     |     |     |     |
| 60 | Tu-DQB-1        | GCC        | GAG | CTG        | GAC | ACG        |     |            |     |            |     |            |     |            |     |            |     |            |     |     |     |     |     |     |     |     |     |     |
| 61 | Tu-DQB-2        | •••        | ••• | •••        | ••• | •••        |     |            |     |            |     |            |     |            |     |            |     |            |     |     |     |     |     |     |     |     |     |     |
| 62 | Tu-DQB-3        | •••        | ••C | G          | ••  | ••         | G   |            |     |            |     |            |     |            |     |            |     |            |     |     |     |     |     |     |     |     |     |     |
| 63 | Tu-DQB-4        | •••        | ••C | G          | ••  | ••         | ••  |            |     |            |     |            |     |            |     |            |     |            |     |     |     |     |     |     |     |     |     |     |

64

65 **Fig. A1** Alignment of MHC II DQB sequence variants detected as homozygous. Numbers above sequence alignment (first row)  
66 indicate the number of basepairs (i.e. position). The most prevalent sequence variant (Tu-DQB-1), which was found homozygous in  
67 individuals of the two *Tursiops* populations is listed first as reference. A dot (•) indicates an identical basepair with reference to Tu-  
68 DQB-1. Following Heimeier *et al.*, 2009, MHC II DQB codons that encode peptide binding sites are indicated according to: Murray *et*  
69 *al.*, 1995; Hoelzel *et al.*, 1999; Seddon & Ellegren, 2002; Hayashi *et al.*, 2003 and Baker *et al.*, 2006. The peptide binding sites are  
70 highlighted in turquoise color. Primer sequences are not included in this alignment or the analysis.

71

72

73

74

75

76

77 **Table A1** Microsatellite loci and primer sequences for Shark Bay and Bunbury population

| Locus    | Primer sequences            |                             | Multiplex | Label | Allele size range (bp) | No. of Alleles | References |
|----------|-----------------------------|-----------------------------|-----------|-------|------------------------|----------------|------------|
|          | Forward (5'-3')             | Reverse (5'-3')             |           |       |                        |                |            |
| D22      | ACATTCCCAATAAAAAGTTAAAGT    | CTCTTTGACATGCCCTCACC        | 2         | NED   | 110-124                | 5              | (a)        |
| KWM12*   | CTGGGCACTGTCTCTGAACATC      | AGGAACGGCACATAAAGCACTGA     | 3         | VIC   | 156-190                | 15             | (b)        |
| MK3      | TGCATTCATGTAAAGGTGCG        | CTGCAACTAGAGAAAGCC CG       | 3         | NED   | 147-171                | 10             | (c)        |
| MK5      | CTCAGAGGGAAATGAGGCTG        | TGTCTAGAGGTCAAAGCCTTCC      | 3         | 6-FAM | 205-219                | 6              | (c)        |
| MK6      | GTCCTCTTTCCAGGTGTAGCC       | GCCCACTAAGTATGTTGCAGC       | 1         | PET   | 152-190                | 16             | (c)        |
| MK8      | TCCTGGAGCATCTTATAGTGGC      | CTCTTTGACATGCCCTCACC        | 3         | PET   | 87-117                 | 11             | (c)        |
| MK9      | CATAACAAAGTGGGATGACTCC      | TTATCCTGTTGGCTGCAGTG        | 3         | 6-FAM | 168-178                | 6              | (c)        |
| Tur4_E12 | CTGGGCACTGTCTCTGAACATC      | AGGAACGGCACATAAAGCACTGA     | 1         | PET   | 256-280                | 6              | (d)        |
| Tur4_F10 | TCTTGATGGCTCAGAGGATGATTTTAC | AGCCAAACTGAAGATGCAACTGACTAC | 2         | 6-FAM | 374-398                | 7              | (d)        |
| Tur4_66  | GAGGGTGAATGGGGACAAAAT       | TGAAGCCAGGAGACTAGGACAGGTT   | 1         | VIC   | 185-205                | 6              | (d)        |
| Tur4_80  | AGCCAATGTCAGGGTGCTGGAT      | GGGGCTTCTTGGCCTCTGTAA       | 3         | NED   | 287-331                | 9              | (d)        |
| Tur4_87  | CCCCATATGATGCCTTTGTAAGTCC   | AATTCCTTGTAACAAACCTCTTTATCT | 2         | VIC   | 178-194                | 5              | (d)        |
| Tur4_91  | GTTGGCTCTCCAGCTCTCAGGT      | CAGTGGCTCCCATCTGTATTAGTCA   | 2         | PET   | 207-235                | 8              | (d)        |
| Tur4_98* | GTCCCAGAACTTAGCACACTGTC     | CAACTGGGGTCCAAAGAAAGAAG     | 1         | NED   | 192-196                | 2              | (d)        |
| Tur4_105 | CCCCGGCCTGCTTACCTCTG        | CCGCCCCCTCCCCAAGTC          | 1         | 6-FAM | 367-403                | 9              | (d)        |
| Tur4_108 | ACAGGGACCTGAGTGGGTGTAAG     | CTCCCTGGGTCTCTAGGCTACC      | 1         | 6-FAM | 258-270                | 2              | (d)        |
| Tur4_111 | CTCTGTAAGCACCCGTCCTGTGTA    | TTCCCGCAGAATTCTGTGAACC      | 1         | VIC   | 287-307                | 5              | (d)        |
| Tur4_117 | TTGCAGTCAGCGTTTTCCAGAGA     | GCCAGCCCATCCTTCAGATTTT      | 1         | 6-FAM | 175-191                | 5              | (d)        |
| Tur4_128 | ACGTGCGCATGTCTTTGTCTTAT     | CTTTGGACGGGAGTAGAACCTA      | 1         | NED   | 295-311                | 5              | (d)        |
| Tur4_132 | CTTCCATGCGCCAGACAACCT       | TGGCAAGATGAGAGGGAAAGAGG     | 3         | VIC   | 326-334                | 3              | (d)        |
| Tur4_138 | GTGGCTTACCATGGTGGATTCAG     | GCATGGCCATAAAGGGAGGAG       | 2         | 6-FAM | 207-231                | 7              | (d)        |
| Tur4_141 | CACAAGCCTCAACCCTGGTGT       | CTAGTCTGCCAATCTGCCCTACAG    | 2         | NED   | 218-286                | 13             | (d)        |

|          |                          |                          |   |       |         |   |     |
|----------|--------------------------|--------------------------|---|-------|---------|---|-----|
| Tur4_142 | GGCCCCCTTTTCCATCCTCA     | CCAGCCCCCAAATCACGAGT     | 3 | PET   | 330-346 | 5 | (d) |
| Tur4_153 | TGAGTAACCCCAATCTCGGTCTCT | CCAGCCCCCAAATCACGAGT     | 3 | PET   | 215-219 | 2 | (d) |
| Tur4_162 | GCCAACCTCCAGGCAAACACTC   | TGCAGTCAACCTGAGGCAAGTCTC | 3 | 6-FAM | 365-419 | 6 | (d) |

78

79 Primer sequences for 25 microsatellite loci used for genotyping Shark Bay and Bunbury bottlenose dolphins. \*Loci KWM12 and  
80 Tur4\_98 were removed from final analysis because they departed from Hardy-Weinberg-Equilibrium expectations. Annealing  
81 temperature for polymerase chain reaction was 60 °C for all three multiplex PCR reactions. Fluorescent labels for forward primers are  
82 listed in the column “Labels”. The range of allele sizes and the total number of alleles (‘No. Alleles’) for each locus of all individuals  
83 sampled in Shark Bay and Bunbury are listed. References for the primer sequences are (a): Shinohara et al. 1997; (b): Hoelzel et al.,  
84 1998; (c): Krützen et al., 2001; (d): Nater et al., 2009. This table is modified from supplementary Table S1, Manlik et al. (2018):  
85 Manlik, O., Chabanne, D., Daniel, C., Bejder, L., Allen, S.J., Sherwin, W.B. 2018. Demography and genetics suggest reversal of dolphin  
86 source-sink dynamics, with implications for conservation. *Mar. Mammal Sci.*, doi:10.1111/mms.12555.

87

88

89

90

91

92

93

94

95

96

97 **Table A2** Conservative sampling of individuals with MHC and microsatellite data, which  
 98 included equal numbers of males, females, calves (calf), juveniles (juv.) and adults (adu.) for  
 99 each of the two populations. Age classes, i.e. calves, juveniles and adults are defined as in  
 100 Manlik *et al.* (2016).

| <b>Cons. Sampling</b> | <b>calf</b> | <b>juv.</b> | <b>adu.</b> | <b>males</b> | <b>females</b> | <b>Total</b> |
|-----------------------|-------------|-------------|-------------|--------------|----------------|--------------|
| BB cons.              | 2           | 15          | 38          | 32           | 23             | 55           |
| SB sample 1           | 2           | 15          | 38          | 32           | 23             | 55           |
| SB sample 2           | 2           | 15          | 38          | 32           | 23             | 55           |
| SB sample 3           | 2           | 15          | 38          | 32           | 23             | 55           |

101  
 102  
 103  
 104  
 105  
 106  
 107  
 108  
 109  
 110  
 111  
 112  
 113  
 114  
 115  
 116  
 117  
 118  
 119

120 **Table A3** Microsatellite and MHC II DQB diversity measures of the two sampling locations  
 121 of Shark Bay. Measures of microsatellite diversity ( $A_e$  = effective number of alleles;  $^1H$  =  
 122 Shannon index;  $F_{IS}$  = fixation index) and MHC II DQB nucleotide diversity ( $\pi$ ) are listed for  
 123 the two sampling locations in Shark Bay: East Shark Bay (ESB) and West Shark Bay (WSB).  
 124 Subpopulation fixation index ( $F_{ST}$ ) indicates the degree of differentiation between ESB and  
 125 WSB.

| Location   | Microsatellite diversity |       |       |          |          | MHC II DQB nucleotide diversity |       |         |
|------------|--------------------------|-------|-------|----------|----------|---------------------------------|-------|---------|
|            | <i>n</i>                 | $A_e$ | $^1H$ | $F_{IS}$ | $F_{ST}$ | <i>n</i>                        | $\pi$ |         |
| ESB        | Mean                     | 409   | 3.131 | 1.205    | 0.030    | Mean                            | 231   | 0.06548 |
|            | SE                       |       | 0.365 | 0.102    | 0.009    |                                 |       | SD      |
| ESB vs WSB |                          |       |       |          | 0.006    |                                 |       |         |
| WSB        | Mean                     | 258   | 3.180 | 1.225    | 0.026    | Mean                            | 45    | 0.06197 |
|            | SE                       |       | 0.334 | 0.099    | 0.010    |                                 |       | SD      |

126  
 127  
 128  
 129  
 130  
 131  
 132  
 133  
 134  
 135  
 136  
 137  
 138  
 139  
 140

141 **Table A4** MHC II DQB variants\* and BLASTN hits. Names of MHC II DQB sequence  
 142 variants found in the Shark Bay and Bunbury *Tursiops aduncus* populations are listed in  
 143 order from Tu-DQB-1 to Tu-DQB-3. Only the four sequence variants of thirty-nine  
 144 individuals that are homozygous for all 172 nucleotide sites are listed here. Sequence  
 145 identities to alleles that closely match these sequence variants and are published on GenBank  
 146 are shown along with allele names and species in which they were found. Note that Tu-DQB-  
 147 4 is identical (100% identity at 100% coverage) to the MHC II DQB exon 2 allele *Dede-a*,  
 148 which was reported in the common dolphin (*Delphinus delphis*). Additional sequence  
 149 variants, i.e. haplotypes, which were inferred by haplotype reconstruction, are not shown here  
 150 (see main text).

| <b>Variant</b> | <b>Identity</b> | <b>Allele</b>                    | <b>Species</b>                 |
|----------------|-----------------|----------------------------------|--------------------------------|
| Tuad-DQB*1     | 99%             | Tutr-DQB*27                      | <i>Tursiops truncatus</i>      |
|                | 100%            | Tutr-DQB*06 (Note: 98% coverage) | <i>Tursiops truncatus</i>      |
|                | 98%             | Stco-DQB*04                      | <i>Stenella coeruleoalba</i>   |
|                | 98%             | Orbr-a                           | <i>Orcaella brevirostris</i>   |
|                | 97%             | Cehe-DQB*02                      | <i>Cephalorhynchus hectori</i> |
|                | 97%             | Tutr-DQB*25                      | <i>Tursiops truncatus</i>      |
| Tuad-DQB*2     | 100%            | Tutr-DQB*03 (Note: 98% coverage) | <i>Tursiops truncatus</i>      |
|                | 98%             | Stco-DQB*04                      | <i>Stenella coeruleoalba</i>   |
|                | 98%             | Cehe-DQB*02                      | <i>Cephalorhynchus hectori</i> |
|                | 97%             | Tutr-DQB*01; Tutr-DQB*15         | <i>Tursiops truncatus</i>      |
| Tuad-DQB*3     | 99%             | Stco-DQB*06                      | <i>Stenella coeruleoalba</i>   |
|                | 99%             | Tutr-DQB*24 (Note: 98% coverage) | <i>Tursiops truncatus</i>      |
|                | 99%             | Tutr-DQB*13 (Note: 98% coverage) | <i>Tursiops truncatus</i>      |
|                | 98%             | Stco-DQB*05                      | <i>Stenella coeruleoalba</i>   |
| Tuad-DQB*4     | 100%            | Dede-a                           | <i>Delphinus delphis</i>       |
|                | 99%             | Tutr-DQB*01                      | <i>Tursiops truncatus</i>      |
|                | 98%             | DQB*0101 (LOC101278540)          | <i>Orcinus orca</i>            |
|                | 98%             | Tutr-DQB*02                      | <i>Tursiops truncatus</i>      |

151

152

153

154

155

156

157

158

159 **Table A5** Comparison of microsatellite measures within three SB subsamples.  
 160 Mean values for microsatellite observed heterozygosity ( $H_o$ ), expected heterozygosity relative  
 161 to Hardy-Weinberg Equilibrium expectations ( $H_e$ ), effective number of alleles ( $A_e$ ) and  
 162 Shannon indices ( ${}^1H$ ) are shown for each of the subsamples (SB sample 1-3).  $F$  and  $p$ -values  
 163 for analysis of variance (ANOVA) test are tabulated comparing the three subsamples.  
 164 \*ANOVA test on  $A_e$  was based on log-transformed values because the original values were  
 165 not normally distributed.

|                           | <b>SB sample 1</b> | <b>SB sample 2</b> | <b>SB sample 3</b> | <b><math>F</math></b> | <b><math>p</math></b> | <b>Sig.</b> |
|---------------------------|--------------------|--------------------|--------------------|-----------------------|-----------------------|-------------|
| <b><math>H_o</math></b>   | 0.551              | 0.566              | 0.576              | 0.0919                | 0.9124                | ns          |
| <b><math>H_e</math></b>   | 0.561              | 0.587              | 0.585              | 0.130                 | 0.8793                | ns          |
| <b><math>A_e</math></b>   | 2.931              | 3.094              | 3.051              | 0.0788*               | 0.9243*               | ns*         |
| <b><math>{}^1H</math></b> | 1.141              | 1.194              | 1.185              | 2.886                 | 0.0655                | ns          |

166

167

168
